# Supplementary material for: A practical synthetic route to functionalized THBCs and oxygenated analogues via intramolecular Friedel–Crafts reactions
Source: Royal Society of Chemistry journal article supplement (doi:10.1039/b607864h), 2006-01-01
Supplement: b607864h.pdf [file b607864h.pdf]

## **SUPPORTING INFORMATION**

### **A Practical Synthetic Route to Functionalized THBCs and Oxygenated Analogous via Intramolecular Friedel-Crafts Reactions**

**Marco Angeli, Marco Bandini,\* Andrea Garelli, Fabio Piccinelli, Simona Tommasi, Achille Umani-Ronchi\***

Dipartimento di Chimica “G. Ciamician”, Alma Mater Studiorum -Università di Bologna - Alma Mater Studiorum -  
Via Selmi 2, 40126, Bologna, Italy.

Fax: +39 (0)51/2099456

E-mail: marco.bandini@unibo.it; achille.umanironchi@unibo.it

**General Remarks:** <sup>1</sup>H-NMR spectra were recorded on Varian 200 (200 MHz) or Varian 300 (300 MHz) spectrometers. Chemical shifts are reported in ppm from tetramethylsilane with the solvent resonance as the internal standard (deuteriochloroform:  $\delta$  7.27 ppm). Data are reported as follows: chemical shift, multiplicity (s = singlet, d = duplet, t = triplet, q = quartet, br = broad, m = multiplet), coupling constants (Hz). <sup>13</sup>C-NMR spectra were recorded on a Varian 200 (50 MHz) or Varian 300 (75 MHz) spectrometers with complete proton decoupling. Chemical shifts are reported in ppm from tetramethylsilane with the solvent as the internal standard (deuteriochloroform:  $\delta$  77.0 ppm). Mass spectra were performed at an ionizing voltage of 70 eV. Analytical high performance liquid chromatography (HPLC) was performed on a HP 1090 liquid chromatograph equipped with a variable wavelength UV detector (deuterium lamp 190-600 nm) and using a Daicel Chiralcel<sup>TM</sup> OD and OF columns (0.46 cm I.D. x 25 cm) (Daicel Inc.). HPLC grade isopropanol and *n*-hexane were used as the eluting solvents. Elemental analyses were carried out by using a EACE 1110 CHNOS analyzer. All the commercially available reagents were used without further purification. Melting points were determined with Büchi 150 melting point unit and are not corrected. IR analysis were performed with a FT-IR NICOLET 205 spectrophotometer and the spectra are expressed by wavenumber (cm<sup>-1</sup>). LC-electrospray ionization mass spectra were obtained with Agilent Technologies MSD1100 single-quadrupole mass spectrometer.

#### **Typical procedure for the synthesis of *N*protected-allylindole (6).**

A 50 mL two-necked flask equipped with a magnetic stirrer flamed under vacuum was charged, under nitrogen atmosphere, with 15 mL of anhydrous CH<sub>2</sub>Cl<sub>2</sub>, 1.52 mmol of allylamine.<sup>1</sup> Then 211

$\mu\text{L}$  (1.52 mmol) of triethylamine, 18 mg (0.152 mmol) of DMAP and finally 111  $\mu\text{L}$  (1.44 mmol) of the desired reagent (**6a**:  $(\text{Boc})_2\text{O}$ , **6b**:  $\text{ClCbz}$ , **6c**:  $\text{ClCO}_2\text{Me}$ , **6d**:  $(\text{COCF}_3)_2\text{O}$ ) were added. The mixture was stirred for 15 hs at rt and then judged complete by TLC analysis and finally quenched with  $\text{H}_2\text{O}$  (5 mL). The two phases separated and the aqueous phase was extracted with ethyl acetate (3 x 5 mL). The collected organic layers were dried with  $\text{Na}_2\text{SO}_4$ , concentrated under reduced pressure and the crude was purified by flash-chromatography.

**2-[methylen-*N*-(*t*-butoxycarbonyl)-allylamine]-indole 6a** (400 mg, 92%) as a pale brown solid, mp 76-77 °C;  $R_f$  0.3 (cyclohexane/ $\text{Et}_2\text{O}$  95/5); (Found: C, 71.22; H, 7.68; N, 9.75.  $\text{C}_{17}\text{H}_{22}\text{N}_2\text{O}_2$  requires C, 71.30; H, 7.74; N, 9.78);  $\nu_{\text{max}}(\text{nujol})/\text{cm}^{-1}$  3264m, 1671s, 1409m, 1318w, 1269m, 1251m, 1160s, 1125m, 914m and 864m;  $\delta_{\text{H}}(200 \text{ MHz}; \text{CDCl}_3; \text{Me}_4\text{Si})$  8.99 (1H, br s, NH), 7.56 (1H, d,  $J$  7.8, Ar), 7.35 (1H, d,  $J$  7.8 Hz, Ar), 7.05-7.22 (2H, m, Ar), 6.35 (1H, s, Ar), 5.65-5.80 (1H, m,  $\text{CH}_2\text{CH}=\text{CH}_2$ ), 5.12-5.21 (2H, m,  $\text{CH}_2\text{CH}=\text{CH}_2$ ), 4.37 (2H, s,  $\text{CCH}_2\text{NBoc}$ ), 3.81 (2H, d,  $J$  7.8,  $\text{NCH}_2\text{CH}$ ), 1.51 (9H, s, *t*-Bu);  $\delta_{\text{C}}(50 \text{ MHz}; \text{CDCl}_3; \text{Me}_4\text{Si})$  156.8, 136.4, 135.8, 133.5, 127.7, 121.8, 120.2, 119.6, 116.7, 110.9, 101.5, 80.4, 49.7, 43.5, 28.4;

**2-[methylen-*N*-(carbobenzoxy)-allylamine]-indole 6b** (413 mg, 85%) as a brown viscous oil;  $R_f$  0.3 (cyclohexane/ $\text{Et}_2\text{O}$  9/1); (Found: C, 74.95; H, 6.25; N, 8.70.  $\text{C}_{20}\text{H}_{20}\text{N}_2\text{O}_2$  requires C, 74.98; H, 6.29; N, 8.74);  $\nu_{\text{max}}/\text{cm}^{-1}$  3642w, 3403br, 3324br, 3078m, 3059m, 3025m, 2946br, 2243w, 1686s, 1613m, 1546m, 1447s, 1407s, 1334s, 1241s, 1136s, 990s, 910s and 738s;  $\delta_{\text{H}}(200 \text{ MHz}; \text{CDCl}_3; \text{Me}_4\text{Si})$  8.93 (1H, br, NH), 7.60-7.04 (9H, m, Ar), 6.37 (1H, s, Ar), 5.78 (1H, m,  $\text{CH}_2\text{CH}=\text{CH}_2$ ), 5.22 (2H, s,  $\text{OCH}_2\text{Ph}$ ), 5.18-5.20 (2H, m,  $\text{CH}_2\text{CH}=\text{CH}_2$ ), 4.51 (2H, s,  $\text{CCH}_2\text{NCbz}$ ), 3.92 (2H, d,  $J$  5.8,  $\text{NCH}_2\text{CH}$ );  $\delta_{\text{C}}(50 \text{ MHz}; \text{CDCl}_3; \text{Me}_4\text{Si})$  157.4, 136.3, 135.0, 134.4, 133.1, 128.9, 128.5, 128.2, 128.1, 127.6, 122.0, 120.3, 119.6, 117.3, 110.9, 101.9, 67.6, 49.3, 43.9;

**Allyl-(1H-indol-2-ylmethyl)-carbamic acid methyl ester 6c** (327 mg, 88%) as a brown viscous oil;  $R_f$  0.3 (cyclohexane/ $\text{Et}_2\text{O}$  9/1); (Found: C, 68.83; H, 6.60; N, 11.47.  $\text{C}_{14}\text{H}_{16}\text{N}_2\text{O}_2$  requires C, 68.80; H, 6.55; N, 11.45);  $\nu_{\text{max}}/\text{cm}^{-1}$  3324br, 3052s, 2952s, 2243m, 1693s, 1580m, 1547m, 1454br, 1235s, 1136s, 997m, 924s, 785s and 725s;  $\delta_{\text{H}}(200 \text{ MHz}; \text{CDCl}_3; \text{Me}_4\text{Si})$  8.95 (1H, br s, NH), 7.57 (1H, d,  $J$  8.0, Ar), 7.35 (1H, d,  $J$  8.0, Ar), 7.05-7.26 (2H, m, Ar), 6.37 (1H, s, Ar), 5.68-5.87 (1H, m,  $\text{CH}_2\text{CH}=\text{CH}_2$ ), 5.15-5.25 (2H, m,  $\text{CH}_2\text{CH}=\text{CH}_2$ ), 4.88 (2H, s,  $\text{CCH}_2\text{NCO}$ ), 3.86 (2H, d,  $J$  8.1,  $\text{NCH}_2\text{CH}$ ), 3.79 (3H, s,  $\text{OCH}_3$ );  $\delta_{\text{C}}(50 \text{ MHz}; \text{CDCl}_3; \text{Me}_4\text{Si})$  158.7, 136.4, 134.8, 132.9, 127.6, 121.7, 120.1, 119.4, 116.9, 110.8, 101.6, 52.8, 48.8, 43.5;

**2-[methylen-*N*-(trifluoroacetyl)-allylamine]-indole 6d** (287 mg, 67%) as a pale pink solid, mp 68-69°C;  $R_f$  0.3 (cyclohexane/AcOEt 8/2); (Found: C, 59.61; H, 4.61; N, 9.90.  $C_{14}H_{13}F_3N_2O$  requires C, 59.57; H, 4.64; N, 9.92);  $\nu_{max}$ (nujol)/ $cm^{-1}$  3360s, 1672s, 1339m, 1299m, 1198s, 1170s, 1001w, 921m, 786s, 752m;  $\delta_H$ (300 MHz;  $CDCl_3$ ;  $Me_4Si$ ) 8.78 (1H, br s, NH), 7.59 (1H, d,  $J$  7.8, Ar), 7.37 (1H, d,  $J$  8.1, Ar), 7.25-7.08 (2H, m, Ar), 6.44 (1H, s, Ar), 5.82 (1H, m,  $CH_2CH=CH_2$ ), 5.40-5.45 (2H, dd,  $J$  9.0,  $CH_2CH=CH_2$ ), 4.64 (2H, s,  $CCH_2NCO$ ), 4.03 (2H, d,  $J$  5.7,  $NCH_2CH$ );  $\delta_C$ (50 MHz;  $CDCl_3$ ;  $Me_4Si$ ) 158.0, 136.7, 132.4, 131.2, 130.4, 127.3, 122.7, 120.5, 119.9, 113.6, 111.2, 103.3, 49.6, 43.4.

### Synthesis of 2-[(Phenyl)-methylen-*N*-(*t*-butoxycarbonyl)-allylamine]-indole 6f

In a flamed two-necked flask under  $N_2$  and equipped with a condenser, were added 50 mL of dry toluene, 500 mg (3.5 mmol) of indole-2-carboxaldehyde, 2.0 g (17.5 mmol) of  $MgSO_4$  and 260  $\mu L$  (3.5 mmol) of allylamine. The reaction was refluxed for 24 h and, after elimination of  $MgSO_4$  by filtration on pad of celite, the solvent was evaporated under reduced pressure and the crude imine was isolated as a brown viscous oil;  $\nu_{max}/cm^{-1}$  2923s, 2853s, 1713s, 1633s, 1447m, 1221s and 1001m;  $\delta_H$ (200 MHz;  $CDCl_3$ ;  $Me_4Si$ ) 9.22 (1H, br s,  $CHN$ ), 8.27 (1H, t,  $J$  1.2, Ar), 7.65 (1H, d,  $J$  7.4, Ar), 7.39-7.06 (2H, m, Ar), 6.79 (1 H, s, Ar), 6.21-5.96 (1H, m,  $CH_2CH=CH_2$ ), 5.31-5.08 (2H, m,  $CH_2CH=CH_2$ ), 4.27-4.23 (2H, m,  $NCH_2CH$ ). The crude imine (3.5 mmol) was dissolved in anhydrous THF (30 mL) and the solution cooled to -23°C. Then  $BF_3 \cdot OEt_2$  (3.8 mmol) was added. After stirring for 15 min a solution of PhLi (2.1M,  $Et_2O$ ) was added dropwise over 20 min and the mixture allowed stirring at -23°C over 4h. The reaction mixture was then quenched with NaOH (10%, 8 mL) and the phases separated. The aqueous layer was extracted with  $CH_2Cl_2$  (3 x 15 mL) and the combined organic phases washed with brine and dried under  $Na_2SO_4$ . After evaporation the crude was purified by flash chromatography on silica using a mixture of cyclohexane/AcOEt 85:15 to give the intermediate deprotected amine-indole (596 mg, 65%);  $\delta_H$ (200 MHz;  $CDCl_3$ ;  $Me_4Si$ ) 8.56 (1H, br, NH), 7.53 (1H, d,  $J$  6.8, Ar), 7.28-7.41 (7H, m, Ar), 7.03-7.18 (2H, m, Ar), 6.31 (1H, s, Ar), 5.89-6.05 (1H, m,  $CH_2CH=CH_2$ ), 5.12-5.26 (2H, m,  $CH_2CH=CH_2$ ), 5.08 (1H, s,  $PhCHNH$ ), 3.29 (2H, dd,  $J$  1.4 and 5.8,  $NCH_2CH$ );  $\delta_C$ (50 MHz;  $CDCl_3$ ;  $Me_4Si$ ) 141.8, 140.5, 136.2, 135.8, 128.4, 128.7 (2 C), 127.6, 127.3 (2 C), 121.5, 120.2, 119.6, 116.6, 110.8, 100.4, 60.3, 50.0. The purified allylamine was monoprotected (Boc) as described for **6a**. Starting from 0.4 mmol of amine, **6f** was obtained (75 mg, 52%) as a yellow oil;  $\delta_H$ (200 MHz;  $CDCl_3$ ;  $Me_4Si$ ) 8.00 (1H, d,  $J$  8.8, NH), 7.50-7.55 (1H, m, Ar), 7.20-7.32 (8H, m, Ar), 6.69 (1H, s, Ar), 5.89-6.09 (m, 1H,

CH<sub>2</sub>CH=CH<sub>2</sub>), 5.64 (s, 1H, PhCHNH), 5.26-5.31 (1H, m, CH<sub>2</sub>CH=CH<sub>2</sub>), 5.10-5.19 (1H, m, CH<sub>2</sub>CH=CH<sub>2</sub>), 3.29-3.40 (2H, m, NCH<sub>2</sub>CH), 1.53 (9H, s, *t*-Bu); *m/z* (LC -ESI-MS) 363 (MH<sup>+</sup>).

#### Typical procedure for the synthesis of *O*-allylindole (10).

In a flamed two-necked flask was added, under a nitrogen atmosphere, 15 mL of anhydrous THF and NaH (69 mg, 3.0 mmol). This suspension was cooled to 0°C and 2.0 mmol of *N*-methyl-indolyl alcohol<sup>[1]</sup> were carefully added at once. After 2 h stirring at 0°C, 345 μL of allylbromide (4.0 mmol) were introduced by syringe and the temperature was allowed to warm at room temperature by removing the cooling bath. The reaction course was monitored by TLC and after 20 h, 10 mL of a saturated NaHCO<sub>3</sub> were added to the solution at 0°C to quench the reaction. After evaporation of THF and usual work-up (Et<sub>2</sub>O, brine, Na<sub>2</sub>SO<sub>4</sub>) the crude mixture was purified by flash chromatography to afford **10a**; R<sub>f</sub> 0.35 (cyclohexane/Et<sub>2</sub>O 70:30) (Found: C, 77.52; H, 7.45; N, 6.96. C<sub>13</sub>H<sub>15</sub>NO requires C, 77.58; H, 7.51; N, 6.96);  $\nu_{\max}/\text{cm}^{-1}$  3050s, 2949s, 2853m, 1738m, 1649s, 1546m, 1462m, 1064m and 738m;  $\delta_{\text{H}}$ (200 MHz; CDCl<sub>3</sub>; Me<sub>4</sub>Si) 7.56-7.65 (1 H, d, *J* 8.8 Ar), 7.25-7.40 (1 H, m, Ar), 7.01-7.21 (2 H, m, Ar), 6.49 (1 H, s, Ar), 5.85-6.05 (1 H, m, CH<sub>2</sub>CH=CH<sub>2</sub>), 5.22-5.41 (2 H, m, CH<sub>2</sub>CH=CH<sub>2</sub>), 4.71 (2 H, s, CCH<sub>2</sub>O), 4.02 (2 H, dt, *J* 1.8 and *J* 5.6, OCH<sub>2</sub>CH), 3.81 (3 H, s, NCH<sub>3</sub>);  $\delta_{\text{C}}$ (50 MHz; CDCl<sub>3</sub>; Me<sub>4</sub>Si) 138.0, 135.6, 134.4, 127.1, 121.7, 120.6, 119.3, 117.3, 109.0, 102.8, 70.2, 63.9, 29.8.

**2-Allyloxymethyl-5-chloro-1-methyl-1H-indole 10b** was obtained (165 mg, 75%) as a pale yellow solid; R<sub>f</sub> 0.3 (cyclohexane/Et<sub>2</sub>O 9/1); (Found: C, 66.20; H, 5.95; N, 5.95. C<sub>13</sub>H<sub>14</sub>ClNO requires C, 66.24; H, 5.99; N, 5.94);  $\nu_{\max}/\text{cm}^{-1}$  3051s 2955m, 2850s, 1739s, 1648m, 1550m, 1462m, 1064w and 738w;  $\delta_{\text{H}}$ (300 MHz; CDCl<sub>3</sub>; Me<sub>4</sub>Si) 7.55 (1H, s, Ar), 7.18-7.26 (3H, m, Ar), 5.87-6.00 (1H, m, CH<sub>2</sub>CH=CH<sub>2</sub>), 6.42 (1H, s, Ar), 5.21-5.34 (2H, m, CH<sub>2</sub>CH=CH<sub>2</sub>), 4.66 (2H, s, CCH<sub>2</sub>O), 4.02 (2H, d, *J* 5.4, OCH<sub>2</sub>CH), 3.81 (3H, s, NCH<sub>3</sub>);  $\delta_{\text{C}}$ (50 MHz; CDCl<sub>3</sub>; Me<sub>4</sub>Si) 137.5, 136.8, 134.6, 128.4, 125.4, 122.4, 120.3, 118.0, 110.5, 102.7, 70.8, 64.2, 30.4.

#### Typical CM procedure for the synthesis of indolyl enones (8/12).

To a 50 mL flamed two-necked flask, equipped with a magnetic stirrer, was added 2.5 mL of anhydrous CH<sub>2</sub>Cl<sub>2</sub>. The solvent was degassed by freezing-pump procedure and then a solution of protected allylindole derivative **6/10** (0.2 mmol, CH<sub>2</sub>Cl<sub>2</sub>), 13 mg (0.016 mmol, 8 mol%) of ruthenium carbene catalyst and 1.2 mmol (6 equiv.) of the desired enone (**7a/7b**) were added and the deep brown mixture was refluxed for 1 hr. The solution was then cooled to rt and a second drop of catalyst (0.007 mmol) was added. The procedure was repeated for the third time after a subsequent hour of refluxing. After the third addition, the mixture was stirred and refluxed for 15 hs

and then judged complete by TLC analysis. The crude was diluted with CH<sub>2</sub>Cl<sub>2</sub>, concentrated under reduced pressure and finally purified by flash-chromatography thus affording:

**8aa** (43 mg, 65%) as a brown viscous oil [recovered starting = 26%]; R<sub>f</sub> 0.3 (cyclohexane/AcOEt 8/2); (Found: C, 69.45; H, 7.31; N, 8.52. C<sub>19</sub>H<sub>24</sub>N<sub>2</sub>O<sub>3</sub> requires C, 69.49; H, 7.37; N, 8.53);  $\nu_{\max}/\text{cm}^{-1}$  3330br, 3085m, 3058m, 2979s, 2926s, 2302w, 1699s, 1627s, 1547m, 1448s, 1401s, 1361s, 1242s, 1151s, 1109m, 950m, 877m and 744s;  $\delta_{\text{H}}$ (200 MHz; CDCl<sub>3</sub>; Me<sub>4</sub>Si) 8.90 (1H, br s, NH), 7.56 (1H, d, *J* 7.4, Ar), 7.35 (1H, d, *J* 7.8, Ar), 7.23-7.05 (2H, m, Ar), 6.62 (1H, dt, *J*<sub>1</sub> 15.8 and *J*<sub>2</sub> 4.4, CH<sub>2</sub>CH=CH), 6.35 (1H, s, Ar), 6.08 (1H, d, *J* 15.8, CH<sub>2</sub>CH=CH), 4.45 (2H, s, CCH<sub>2</sub>N), 4.00 (2H, d, *J* 4.2, NCH<sub>2</sub>CH), 2.18 (3H, s, CH<sub>3</sub>), 1.51 (9H, s, *t*-Bu);  $\delta_{\text{C}}$ (50 MHz; CDCl<sub>3</sub>; Me<sub>4</sub>Si) 197.4, 156.5, 142.2, 136.6, 135.2, 131.1, 128.0, 122.0, 120.3, 119.7, 111.0, 101.8, 80.9, 48.4, 44.3, 28.2, 27.0; *m/z* (LC -ESI-MS) 363 (MH<sup>+</sup>), 351 (MNa<sup>+</sup>);

**8ba** (25 mg, 34%) as a brown viscous oil [recovered starting = 41%] R<sub>f</sub> 0.3 (cyclohexane/AcOEt 8/2); (Anal.: Calcd for C<sub>22</sub>H<sub>22</sub>N<sub>2</sub>O<sub>3</sub>: C, 72.91; H, 6.12; N, 7.73. Found: C, 72.85; H, 6.08; N, 7.70);  $\nu_{\max}/\text{cm}^{-1}$  3403br, 3310br, 3051s, 2952s, 2913s, 2236w, 1706s, 1666s, 1586m, 1474s, 1427s, 1355s, 1262s, 1097s, 910s and 738s;  $\delta_{\text{H}}$ (200 MHz; CDCl<sub>3</sub>; Me<sub>4</sub>Si) 8.87 (1H, br, NH), 7.60-7.04 (9H, m, Ar), 6.61 (1H, dt, *J*<sub>1</sub> 15.4 and *J*<sub>2</sub> 5.2, CH<sub>2</sub>CH=CH), 6.36 (1H, s, Ar), 6.06 (1H, d, *J* 16.6, CH<sub>2</sub>CH=CH), 5.22 (2H, s, CCH<sub>2</sub>N), 4.52 (2H, s, OCH<sub>2</sub>Ph), 4.08 (2H, d, *J* 4.4, NCH<sub>2</sub>CH), 2.18 (3H, s, *t*-Bu);  $\delta_{\text{C}}$ (50 MHz; CDCl<sub>3</sub>; Me<sub>4</sub>Si) 207.9, 156.1, 136.4, 136.2, 130.2, 128.8, 128.6, 128.2, 128.0, 125.7, 125.1, 123.2, 122.0, 119.8, 118.8, 117.9, 111.5, 111.0, 67.4, 46.2, 42.2, 29.7; *m/z* (LC -ESI-MS) 362 (MH<sup>+</sup>);

**8ca** (27 mg 50%) as a brown viscous oil [recovered starting = 27%]; R<sub>f</sub> 0.3 (cyclohexane/AcOEt 8/2); (Anal.: Calcd for C<sub>16</sub>H<sub>18</sub>N<sub>2</sub>O<sub>3</sub>: C, 67.12; H, 6.34; N, 9.78. Found: C, 7.05; H, 6.29; N, 9.76);  $\nu_{\max}/\text{cm}^{-1}$  3330br; 1669s, 1638s, 1546s, 1432m, 1228s, 1161m, 1067m and 739s;  $\delta_{\text{H}}$ (300 MHz; CDCl<sub>3</sub>; Me<sub>4</sub>Si) 8.88 (1H, br s, NH), 7.56 (1H, d, *J* 7.8, Ar), 7.35 (1H, d, *J* 8.1, Ar), 7.22-7.05 (2H, m, Ar), 6.62 (1H, dt, *J*<sub>1</sub> 15.9 and *J*<sub>2</sub> 5.1, CH<sub>2</sub>CH=CH), 6.36 (1H, s, Ar), 6.09 (1H, dd, *J*<sub>1</sub> 16.2 and *J*<sub>2</sub> 1.5, CH<sub>2</sub>CH=CH), 4.50 (2H, s, CCH<sub>2</sub>N), 4.04 (2H, d, *J* 4.5, NCH<sub>2</sub>CH), 3.79 (3H, s, OMe), 2.18 (3H, s, Me);  $\delta_{\text{C}}$ (50 MHz; CDCl<sub>3</sub>; Me<sub>4</sub>Si) 195.6, 156.3, 139.1, 136.1, 135.2, 129.2, 127.6, 121.8, 120.6, 119.6, 111.0, 102.9, 51.5, 50.1, 48.0, 24.8;

**8da** (27 mg, 41%) as a brown viscous oil [recovered starting = 18%]; R<sub>f</sub> 0.3 (cyclohexane/AcOEt 9/1); (Anal.: Calcd for C<sub>16</sub>H<sub>15</sub>F<sub>3</sub>N<sub>2</sub>O<sub>2</sub>: C, 59.26; H, 4.66; N, 8.64. Found: C, 59.20; H, 4.63; N, 8.60);  $\nu_{\max}/\text{cm}^{-1}$  3327br, 1689s, 1663s, 1548s, 1223s, 1067m and 734s;  $\delta_{\text{H}}$ (200 MHz; CDCl<sub>3</sub>; Me<sub>4</sub>Si) 8.68 (1H, br s, NH), 7.45 (1H, d, *J* 7.8, Ar), 7.35-7.05 (3H, m, Ar), 6.72 (1H, dt, *J*<sub>1</sub> 15.6 and *J*<sub>2</sub> 1.8, CH<sub>2</sub>CH=CH), 6.36 (1H, s, Ar), 6.04 (1H, dd, *J*<sub>1</sub> 16.0 and *J*<sub>2</sub> 1.8, CH<sub>2</sub>CH=CH), 4.53 (2H, s,

CCH<sub>2</sub>N), 4.04 (2H, d, *J* 4.5, NCH<sub>2</sub>CH), 2.18 (3H, s, Me);  $\delta_{\text{C}}$ (50 MHz; CDCl<sub>3</sub>; Me<sub>4</sub>Si) 197.0, 169.7, 140.1, 136.6, 135.2, 129.2, 127.5, 123.8, 121.7, 120.5, 119.7, 111.0, 102.9, 48.7, 45.4, 24.9;

**8ab** (30 mg, 38%) as a brown viscous oil; R<sub>f</sub> 0.3 (cyclohexane/AcOEt 8/2); (Anal.: Calcd for C<sub>24</sub>H<sub>26</sub>N<sub>2</sub>O<sub>3</sub>: C, 73.82; H, 6.71; N, 7.17. Found: C, 73.80; H, 6.66; N, 7.15);  $\nu_{\text{max}}/\text{cm}^{-1}$  3395br, 3316br, 2226s, 2847s, 1683s, 1616m, 1452s, 1418m, 1362s, 1277s, 1243s, 1158s, 1017m, 864w, 797m, 752s and 695s;  $\delta_{\text{H}}$ (200 MHz; CDCl<sub>3</sub>; Me<sub>4</sub>Si) 9.08 (1H, br s, NH), 8.00-7.07 (9H, m, Ar), 6.83-6.91 (2H, m, CH<sub>2</sub>CH=CH), 6.38 (1H, s, Ar), 4.52 (2H, s, CCH<sub>2</sub>N), 4.12 (2H, d, *J* 3.2, NCH<sub>2</sub>CH), 1.51 (9H, s, *t*-Bu);  $\delta_{\text{C}}$ (50 MHz; CDCl<sub>3</sub>; Me<sub>4</sub>Si) 187.8, 156.7, 143.7, 137.3, 136.3, 133.1, 132.8, 128.6, 128.4, 128.1, 122.1, 121.8, 120.2, 119.6, 111.0, 101.7, 80.9, 45.0, 44.1, 28.2; *m/z* (LC -ESI-MS) 391 (MH<sup>+</sup>), 413 (MNa<sup>+</sup>), 429 (MK<sup>+</sup>);

**12a** (35 mg, 72%) as yellow viscous oil [recovered starting = 17%]; R<sub>f</sub> 0.3 (cyclohexane/AcOEt 9/1); (Anal.: Calcd for C<sub>15</sub>H<sub>17</sub>NO<sub>2</sub>: C, 74.05; H, 7.04; N, 5.76. Found: C, 74.00; H, 6.99; N, 5.75);  $\nu_{\text{max}}/\text{cm}^{-1}$  3397 br, 3026s, 2207m, 1720s, 1431s, 1323s, 1256s, 1179s, 1156s and 741s;  $\delta_{\text{H}}$ (200 MHz; CDCl<sub>3</sub>; Me<sub>4</sub>Si) 7.60 (1H, d, *J* 7.8, Ar), 7.36-7.06 (3H, m, Ar), 6.77 (2H, dt, *J*<sub>1</sub> 16.0 and *J*<sub>2</sub> 4.4, CH<sub>2</sub>CH=CH), 6.51 (1H, s, Ar), 6.32 (1H, dt, *J*<sub>1</sub> 16.2 and *J*<sub>2</sub> 1.8, CH<sub>2</sub>CH=CH), 4.75 (2H, s, CCH<sub>2</sub>O), 4.18 (2H, dd, *J*<sub>1</sub> 4.4 and *J*<sub>2</sub> 2.0, OCH<sub>2</sub>CH), 3.81 (3H, s, NMe), 2.26 (3H, s, Me);  $\delta_{\text{C}}$ (50 MHz; CDCl<sub>3</sub>; Me<sub>4</sub>Si) 198.1, 138.2, 134.9, 130.4, 129.3, 127.0, 122.1, 119.6, 118.3, 109.2, 103.4, 67.7, 64.8, 44.2, 27.2;

**12b** (24 mg, 39%) as a yellow viscous oil, see ref. 1;

**12c** (23 mg 42%) as a pale brown viscous oil [recovering starting = 26%]; R<sub>f</sub> 0.3 (cyclohexane/AcOEt 75/25); (Anal.: Calcd for C<sub>15</sub>H<sub>16</sub>ClNO<sub>2</sub>: C, 64.87; H, 5.81; N, 5.04. Found: C, 64.85; H, 5.78; N, 5.00);  $\nu_{\text{max}}/\text{cm}^{-1}$  3401br, 3030s, 1722s, 1428s, 1326s, 1260s 1185s and 748s;  $\delta_{\text{H}}$ (200 MHz; CDCl<sub>3</sub>; Me<sub>4</sub>Si) 7.55-7.56 (1H, m, Ar), 7.20-7.26 (3H, m, Ar), 6.77 (1H, dt *J*<sub>1</sub> 16.2 and *J*<sub>2</sub> 5.6, CH<sub>2</sub>CH=CH), 6.44 (1H, s, Ar), 6.21-6.35 (1H, m, CH<sub>2</sub>CH=CH), 4.71 (2H, s, CCH<sub>2</sub>O), 4.18 (2H, dd, *J*<sub>1</sub> 4.4 and *J*<sub>2</sub> 1.8, OCH<sub>2</sub>CH), 3.77 (3H, s NMe), 2.56 (3H, s, Me);  $\delta_{\text{C}}$ (75 MHz; CDCl<sub>3</sub>; Me<sub>4</sub>Si) 198.0, 142.3, 136.6, 136.3, 130.4, 127.9, 125.2, 122.4, 120.1, 110.2, 102.8, 68.0, 65.8, 64.7, 27.2; *m/z* (LC -ESI-MS) 278 (MH<sup>+</sup>);

**9**: the procedure described for **8/12** but starting from 0.12 mmol (45 mg) of **6f**, afforded **9** (20 mg, 43%) as a pale yellow viscous oil [10 mg of **6f** were also recovered from the flash chromatography]; R<sub>f</sub> 0.3 (cyclohexane/AcOEt 92/8); (Found: C, 73.40; H, 7.15; N, 7.10. C<sub>24</sub>H<sub>28</sub>N<sub>2</sub>O<sub>3</sub> requires C, 73.44; H, 7.19; N, 7.14);  $\delta_{\text{H}}$ (200 MHz; CDCl<sub>3</sub>; Me<sub>4</sub>Si) 8.00 (1H, dd, *J*<sub>1</sub> 1.8 and *J*<sub>2</sub> 7.6, Ar), 7.49-7.54 (1H, m, Ar), 7.19-7.33 (7H, m, Ar), 6.70 (1H, s, Ar), 5.63 (1H, s, CHPh), 3.06 (1H, dt, *J*<sub>1</sub> 6.2 and *J*<sub>2</sub> 12.2, NCH<sub>2</sub>CH<sub>2</sub>), 2.92 (1H, dt, *J*<sub>1</sub> 5.4 and *J*<sub>2</sub> 12.2, NCH<sub>2</sub>CH<sub>2</sub>), 2.71 (2H, t, *J* 6.2, NCH<sub>2</sub>CH<sub>2</sub>), 2.54 (3H, s, Me), 1.56 (s, 9H, *t*-Bu);  $\delta_{\text{C}}$ (75 MHz; CDCl<sub>3</sub>; Me<sub>4</sub>Si) 208.5, 150.2,

142.8, 142.0, 136.9, 128.8, 128.2(2C), 127.9(2C), 127.1, 123.7, 122.6, 120.5, 115.4, 108.9, 84.0, 70.0, 44.0, 42.9, 30.1, 28.0(3C);  $m/z$  (LC -ESI-MS) 393 ( $MH^+$ );

**Typical experimental procedure for the catalytic intramolecular Michael reaction catalyzed by  $InBr_3$ .**

A two-necked flask was charged, under a nitrogen atmosphere, with 5 mL of anhydrous  $CH_2Cl_2$ ,  $InBr_3$  (3.5 mg, 0.01 mmol, 10 mol%) and 0.1 mmol of indolyl enone. After completion of the reaction (judged by TLC, HPLC), the mixture was quenched with a saturated solution of  $NaHCO_3$  (3 mL) and extracted with  $Et_2O$  (3 x 3 mL). The organic phases were combined, dried over  $Na_2SO_4$ , concentrated under reduced pressure and the crude mixture was purified by flash chromatography to afford:

**1aa** (39 mg, 90%) as a brown viscous oil;  $R_f$  0.3 (cyclohexane/AcOEt 8/2); (Anal.: Calcd for  $C_{19}H_{24}N_2O_3$ : C, 69.49; H, 7.37; N, 8.53. Found: C, 69.50; H, 7.32; N, 8.50);  $\nu_{max}/cm^{-1}$  3337s, 2355w, 1706s, 1666s, 1275s, 1242m, 1149m, 1102s, 1010m, 904m, 798w, 731s, and 659m;  $\delta_H$ (300 MHz;  $CDCl_3$ ;  $Me_4Si$ ) 8.34 (1H, br s, NH), 7.50-7.05 (4H, m, Ar), 5.07-5.12 (1H, m,  $CH_2CHCH_2$ ), 4.24-4.31 (2H, m,  $CCH_2N$ ), 3.54-3.60 (1H, m,  $NCH_2CH$ ), 3.26-3.29 (1H, m,  $NCH_2CH$ ), 2.74 (2H, d,  $J$  9.3,  $CHCH_2CO$ ), 2.18 (3H, s, Me), 1.50 (9H, s,  $t$ -Bu);  $\delta_C$ (75 MHz;  $CDCl_3$ ;  $Me_4Si$ ) 207.7, 155.5, 136.2, 130.7, 125.9, 121.8, 119.6, 117.8, 111.4, 111.0, 80.3, 46.4, 46.2, 41.7, 30.4, 28.4, 28.1, 26.9;

**1ba** (34 mg, 95%) as a brown viscous oil;  $R_f$  0.3 (cyclohexane/AcOEt 8/2); (Anal.: Calcd for  $C_{22}H_{22}N_2O_3$ : C, 72.91; H, 6.12; N, 7.73. Found: C, 72.90; H, 6.11; N, 7.75);  $\nu_{max}/cm^{-1}$  3303br, 2959s, 2912s, 2859m, 2249w, 1699s, 1626s, 1547m, 1421s, 1354m, 1262s, 1089s and 791s;  $\delta_H$ (300 MHz;  $CDCl_3$ ;  $Me_4Si$ ) 8.01 (1H, br s, NH), 7.60-7.05 (9H, m, Ar), 5.22-5.35 (3H, m,  $CH_2CHCH_2 + CCH_2N$ ), 4.32 (2H, m,  $OCH_2Ph$ ), 4.08-4.12 (1H, m,  $NCH_2CH$ ), 3.63-3.69 (1H, m,  $NCH_2CH$ ), 3.31 (1H, m,  $CHCH_2CO$ ), 2.74 (1H, m,  $CHCH_2CO$ ), 2.18 (3H, s, Me);  $\delta_C$ (50 MHz;  $CDCl_3$ ;  $Me_4Si$ ) 207.9, 156.1, 136.4, 136.2, 130.2, 128.6, 128.4, 128.2, 128.0, 125.9, 122.0, 120.4, 119.8, 117.9, 111.7, 111.0, 67.4, 46.2, 45.7, 42.2, 27.9, 26.9;

**1ca** (27 mg, 95%) as a brown viscous oil;  $R_f$  0.3 (cyclohexane/AcOEt 8/2); (Anal.: Calcd for  $C_{16}H_{18}N_2O_3$ : C, 67.12; H, 6.34; N, 9.78. Found: C, 67.10; H, 6.29; N, 9.78);  $\nu_{max}/cm^{-1}$  3330br, 1679s, 1653s, 1546s, 1268s, 1096m and 711s;  $\delta_H$ (300 MHz;  $CDCl_3$ ;  $Me_4Si$ ) 8.05 (1H, br s, NH), 7.52-7.08 (4H, m, Ar), 5.08-5.13 (1H, m,  $CH_2CHCH_2$ ), 4.27-4.30 (2H, m,  $CCH_2N$ ), 3.79 (3H, s, OMe), 3.64-3.70 (1H, m,  $NCH_2CH$ ), 3.37-3.49 (1H, m,  $NCH_2CH$ ), 2.80 (2H, m,  $CHCH_2CO$ ), 2.18 (3H, s, Me);  $\delta_C$ (75 MHz;  $CDCl_3$ ;  $Me_4Si$ ) 208.0, 156.8, 136.2, 130.2, 125.9, 122.0, 119.8, 117.9, 111.6, 110.0, 52.9, 46.4, 46.2, 42.1, 30.9, 30.5, 29.7, 28.0;

**1da** (23 mg, 70%) as brown viscous oil;  $R_f$  0.3 (cyclohexane/AcOEt 8/2); (Anal.: Calcd for  $C_{16}H_{15}F_3N_2O_3$ : C, 56.47; H, 4.44; N, 8.23. Found: C, 56.40; H, 4.41; N, 8.22);  $\nu_{max}/cm^{-1}$  3327br, 1689s, 1663s, 1548s, 1223s, 1067m and 734s;  $\delta_H$ (200 MHz;  $CDCl_3$ ;  $Me_4Si$ ) 8.05 (1H, br s, NH), 7.55-7.04 (4H, m, Ar), 5.05-5.12 (1H, m,  $CH_2CHCH_2$ ), 4.254.31 (2H, m,  $CCH_2N$ ), 3.613.65 (1H, m,  $NCH_2CH$ ), 3.32-3.39 (1H, m,  $NCH_2CH$ ), 2.79 (2H, m,  $CHCH_2CO$ ), 2.18 (3H, s, Me);  $\delta_C$ (75 MHz;  $CDCl_3$ ;  $Me_4Si$ ) 207.1, 169.4, 136.2, 135.3, 131.5, 123.2, 121.7, 120,6m 119.6, 112.8, 111.0, 57.1, 48.6, 44.2, 26.7, 25.1;

**1ab** (37 mg 95%) as a brown solid, mp 142-143 °C;  $R_f$  0.3 (cyclohexane/AcOEt 8/2); (Anal.: Calcd for  $C_{24}H_{26}N_2O_3$ : C, 73.82; H, 6.71; N, 7.17. Found: C, 73.75; H, 6.66; N, 7.15);  $\nu_{max}/cm^{-1}$  3324br, 2979s, 2935s, 1679s, 1646s, 1454m, 1414s, 1367m, 1275s and 738s;  $\delta_H$ (200 MHz;  $CDCl_3$ ;  $Me_4Si$ ) 8.29 (1H, br s, NH), 7.99 (1H, d,  $J$  7.8, Ar), 7.60-7.05 (8H, m, Ar), 5.18-5.22 (1H, m,  $CH_2CHCH_2$ ), 4.32-4.40 (2H, m,  $CCH_2N$ ), 3.80-3.85 (1H, m,  $NCH_2CH$ ), 3.35-3.40 (3H, m,  $NCH_2CH+CHCH_2CO$ ), 1.51 (9H, s,  $t$ -Bu);  $\delta_C$ (50 MHz;  $CDCl_3$ ;  $Me_4Si$ ) 198.9, 156.8, 136.9, 136.4, 135.0, 133.5, 128.8, 128.2, 122.0, 119.8, 116.2, 113.5, 111.2, 81.5, 64.0, 46.2, 41.3, 29.8, 28.2;

**2a** (24 mg, 98%) as yellow viscous oil;  $R_f$  0.3 (cyclohexane/AcOEt 8:2); (Anal.: Calcd for  $C_{15}H_{17}NO_2$ : C, 74.05; H, 7.04; N, 5.76. Found: C, 73.99; H, 7.01; N, 5.75);  $\nu_{max}/cm^{-1}$  3403br, 3045s, 2926s, 2243m, 1712s, 1460s, 1434s, 1354s, 1256s, 1182s, 1156s, 1083s and 738s;  $\delta_H$ (300 MHz;  $CDCl_3$ ;  $Me_4Si$ ) 7.49 (1H, d,  $J$  7.8, Ar), 7.36-7.07 (3H, m, Ar), 4.81-4.87 (1H, m,  $CCH_2O$ ), 4.01-4.15 (1H, m,  $CCH_2O$ ), 3.85-3.90 (2H, m,  $OCH_2CH$ ), 3.60 (3H, s, NMe), 3.52-5.55 (1H, m,  $CH_2CHCH_2$ ), 2.93 (2H, s,  $CHCH_2CO$ ), 2.18 (3H, s, Me);  $\delta_C$ (50 MHz;  $CDCl_3$ ;  $Me_4Si$ ) 208.3, 142.7, 137.0, 133.1, 121.3, 119.3, 118.0, 109.3, 108.9, 69.6, 63.1, 46.8, 30.6, 29.4, 28.2;

**2b** (30 mg, 97%) as viscous yellow oil;  $R_f$  0.3 (cyclohexane/AcOEt 80:20); (Anal. calcd. for  $(C_{20}H_{19}NO_2)$ : C, 78.66; H, 6.27; N, 4.59; Found: C, 78.62; H, 6.22; N, 4.58);  $\nu_{max}/cm^{-1}$  3045s, 2926s, 2846m, 1739s, 1666m, 1600w, 1461s, 1374m, 1242m, 1082s, 1036w and 738m;  $\delta_H$ (300 MHz;  $CDCl_3$ ;  $Me_4Si$ ) 7.98 (2H, dd,  $J$  1.5 and 7.2, Ar), 7.54-7.59 (2H, m, Ar), 7.46 (2H, t,  $J$  6.9, Ar), 7.32 (1H, d,  $J$  8.1, Ar), 7.22 (1H, t,  $J$  8.1, Ar), 7.11 (1H, t,  $J$  8.4, Ar), 4.92 (1H, d,  $J$  14.4,  $CCH_2O$ ), 4.81 (1H, d,  $J$  14.4,  $CCH_2O$ ), 4.12 (1H, dd,  $J$  1.8 and 11.4,  $OCH_2CH$ ), 3.92 (1H, dd,  $J$  3.3 and 11.4,  $OCH_2CH$ ), 3.73-3.76 (m, 1H,  $CH_2CHCH_2$ ), 3.62 (s, 3H, NMe), 3.45-3.51(m, 2H,  $CHCH_2CO$ );  $\delta_C$ (75 MHz;  $CDCl_3$ ;  $Me_4Si$ ) 199.5, 137.0, 133.3, 133.1, 131.5, 128.5(2C), 128.1(2C), 125.8, 121.3, 119.3, 118.1, 109.6, 108.9, 69.6, 63.2, 41.8, 29.7, 28.6;

**2c** (27 mg, 98%) as a yellow viscous oil;  $R_f$  0.3 (cyclohexane/AcOEt 7:3); (Anal.: Calcd for  $C_{15}H_{16}ClNO_2$ : C, 64.87; H, 5.81; N, 5.04. Found: C, 63.80; H, 5.78; N, 5.00);  $\delta_H$ (300 MHz;  $CDCl_3$ ;  $Me_4Si$ ) 7.44 (1H, s, Ar), 7.13-7.22 (m, 2H, Ar), 4.78-4.82 (2H, m,  $CCH_2O$ ), 4.03 (1H, dd,  $J_1$  1.8 and  $J_2$  11.4,  $OCH_2CH$ ), 3.85 (1H, dd,  $J_1$  8.2 and  $J_2$  11.4,  $OCH_2CH$ ), 3.58 (3H, s, NMe), 3.45-3.58 (1H,



m, CH<sub>2</sub>CHCH<sub>2</sub>), 2.90 (2H, d, *J* 7.0, CHCH<sub>2</sub>CO), 2.19 (3H, s, Me); δ<sub>C</sub>(75 MHz; CDCl<sub>3</sub>; Me<sub>4</sub>Si) 198.8, 142.5, 136.8, 136.5, 130.4, 122.0, 120.2, 110.3, 102.9 70.0, 63.5, 46.7, 30.8, 29.0, 28.6.

**Typical conditions for intramolecular FC reaction catalyzed by [SalenAlCl]-lutidine.**

A 25 mL two-necked flask equipped with a magnetic stirrer flamed under vacuum was charged, under nitrogen atmosphere, with 1 mL of anhydrous CH<sub>2</sub>Cl<sub>2</sub>, 0.012 mmol of catalyst **13a/b** and 0.012 mmol of 2,6-lutidine. The mixture was stirred for 5 min to ensure the formation of the complex, then 0.06 mmol of substrate (**8/10**) were added. After stirring at rt until the reaction was judged complete by HPLC, the mixture was quenched with a saturated solution of NaHCO<sub>3</sub> (3 mL). The two phases were separated and the aqueous phase was extracted with diethyl ether (3 x 5 mL). Finally the organic layers were collected, dried with Na<sub>2</sub>SO<sub>4</sub> and then concentrated under reduced pressure and the crude was purified by flash-chromatography.

**1aa** (19 mg, 98%; ee 26%); [α]<sub>D</sub><sup>20</sup> +6.0° (*c* 0.1, CHCl<sub>3</sub>); chiral HPLC: OD column *n*-hex/IPA 90/10, flow 0.5 mL/min (225 nm), t<sub>1</sub> 13.9 min and t<sub>2</sub> 19.9 min;

**1ba** (15 mg, yield 69%; ee 11%); chiral HPLC: OD column *n*-hex/IPA 80/20, flow 0.5 mL/min (225 nm), t<sub>1</sub> 18.7 min and t<sub>2</sub> 26.1 min;

**1ca** (17 mg, yield 98%; ee 11%); chiral HPLC: OD column *n*-hex/IPA 80/20, flow 0.6 mL/min (225 nm), t<sub>1</sub> 14.5 min and t<sub>2</sub> 20.3 min;

**1da** (10 mg, yield 47%; ee 0%); chiral HPLC: OF column *n*-hex/IPA 90/10, flow 0.6 mL/min (225 nm), t<sub>1</sub> 42.0 min and t<sub>2</sub> 47.5 min;

**1ab** (23 mg, yield 98%; ee 27%); chiral HPLC: OD column *n*-hex/IPA 85/15, flow 0.5 mL/min (225 nm), t<sub>1</sub> 11.4 min and t<sub>2</sub> 13.6 min;

**Typical conditions for intramolecular FC reaction with [SalenAlCl]<sub>2</sub>-InBr<sub>3</sub>.**

A 25 mL two-necked flask equipped with a magnetic stirrer flamed under vacuum was charged, with 1 mL of anhydrous CH<sub>2</sub>Cl<sub>2</sub>, 0.012 mmol of catalyst **13a** and 0.012 mmol of 2,6-lutidine. The mixture was stirred for 5 min, then 0.12 mmol of substrate (**12**) were added. After 16 h stirring, a solution 0.30 M (20 μL, 5 mol%) of InBr<sub>3</sub> in Et<sub>2</sub>O was added and the reaction stirred for the times indicated. The mixture was then quenched with a saturated solution of NaHCO<sub>3</sub> (3 mL). The two phases separated and the aqueous phase extracted with diethyl ether (3 x 5 mL). Finally the organic layers were collected, dried with Na<sub>2</sub>SO<sub>4</sub>, concentrated under reduced pressure and the crude **2** was purified by flash-chromatography.

**2a:** Yield 80%; Ee = 60%;  $[\alpha]_D^{20}$ : +15.4° ( $c = 0.5$ , CHCl<sub>3</sub>); chiral HPLC: OD column; *n*-hex/IPA 90:10; flow 0.5 mL/min (225 nm),  $t_{\text{major}} = 22.2$  min,  $t_{\text{minor}} = 25.1$  min.

**2b:** Yield 61%; Ee = 20%;  $[\alpha]_D^{20}$ : +17.5 ( $c = 0.8$ , CHCl<sub>3</sub>); chiral HPLC: OD column; *n*-hex/IPA 95:5; flow 0.5 mL/min (225 nm),  $t_{\text{major}} = 45.5$  min,  $t_{\text{minor}} = 49.2$  min.

**2c:** Yield 80%; Ee = 60%;  $[\alpha]_D^{20}$ : +18.1 ( $c = 0.5$ , CHCl<sub>3</sub>); chiral HPLC: OF column; *n*-hex/IPA 80:20; flow 0.9 mL/min (225 nm),  $t_{\text{major}} = 24.2$  min,  $t_{\text{minor}} = 29.9$  min.

### <sup>1</sup>H NMR investigation on {[SalenAlCl]<sub>x</sub>(InBr<sub>3</sub>)<sub>y</sub>} species.

To a solution of **13a** (11 mg, 0.02 mmol) in anhydrous DCM were added the desired volume of a preformed solution of InBr<sub>3</sub> in dry Et<sub>2</sub>O (0.3 mM). The clear yellow mixture was stirred for 2h at rt the solvent removed under vacuum and replaced with anhydrous CD<sub>2</sub>Cl<sub>2</sub> (700 μL). The resulting solution was transferred into a flamed NMR tube and the spectra recorded at rt.

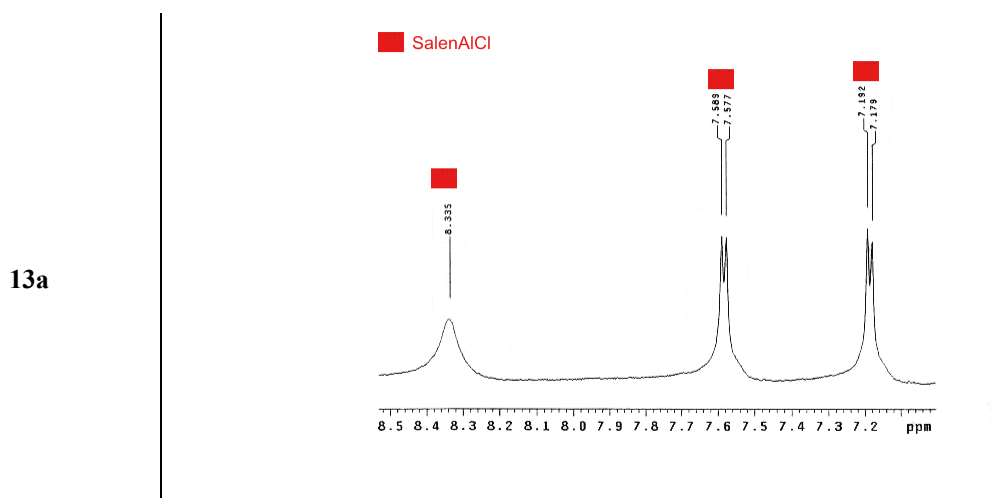

**13a:InBr<sub>3</sub> 1:1**

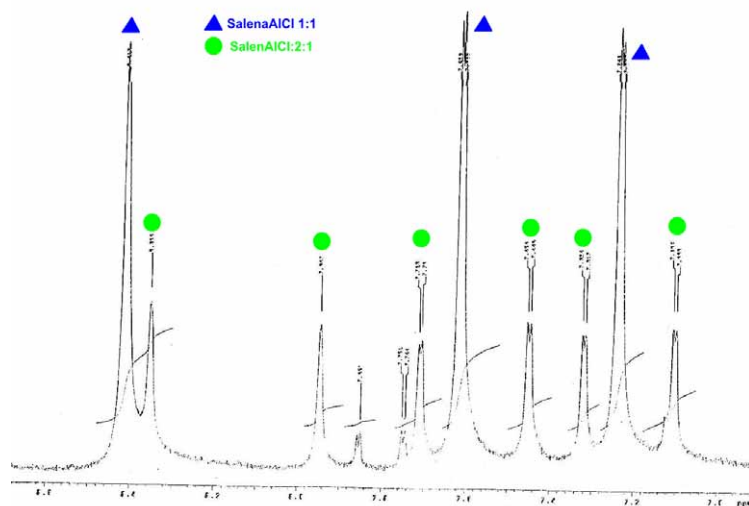

**13a:InBr<sub>3</sub> 2:1**

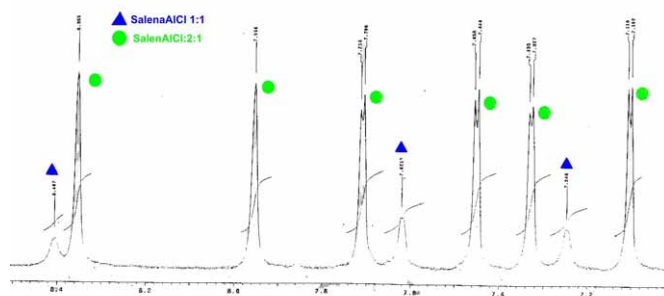

**13a:InBr<sub>3</sub> 4:1**

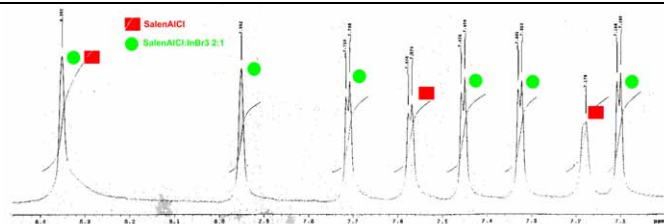

<sup>1</sup> For the synthesis of indolyl-alcohols precursors see ref. M. Agnusdei, M. Bandini, A. Melloni, A. Umani-Ronchi, *J. Org. Chem.* 2003, **68**, 7126.
